# Supplementary material for: Sm3+ rare-earth doping in non-noble metal oxide –WO3 grown on carbon cloth fibre as a bifunctional electrocatalyst for high-performance water electrolysis
Source: Royal Society of Chemistry journal article supplement (doi:10.1039/d1se01563j), 2021-01-01
Supplement: d1se01563j1.pdf [file d1se01563j1.pdf]

## Electronic Supplementary Information

**Sm<sup>3+</sup> rare-earth doping in non-noble metal oxide –WO<sub>3</sub> grown on carbon cloth fibre as a bifunctional electrocatalyst for high-performance water electrolysis.**

**R. Rajalakshmi, C. Viswanathan and N. Ponpandian\***

Department of Nanoscience and Technology, Bharathiar University, Coimbatore 641 046, India

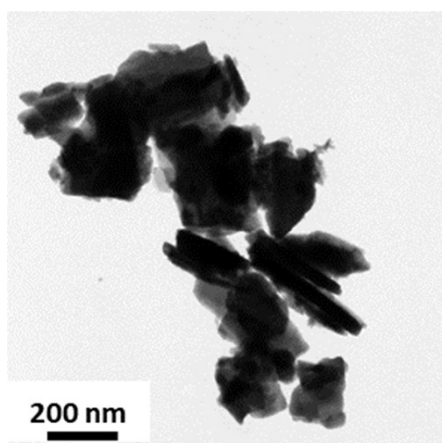

Figure S1. TEM image of Sm 5% doped WO<sub>3</sub> electrocatalyst representing rod and particle morphologies.

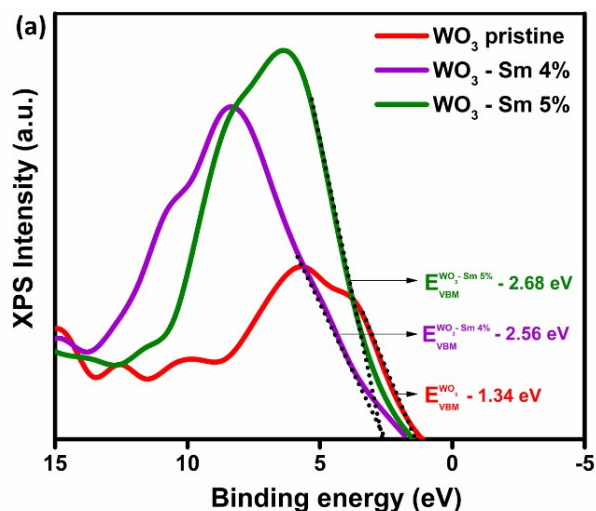

Figure S2. The valence band (VB) edges of pristine WO<sub>3</sub>, WO<sub>3</sub> - Sm 4%, and WO<sub>3</sub> - Sm 4% electrocatalysts.

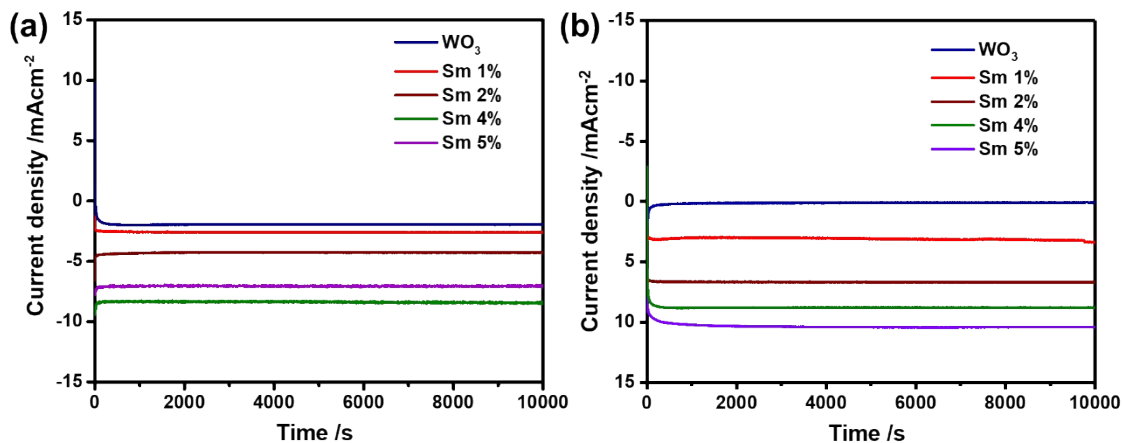

Figure S3. Chronoamperometry curves recorded for all the prepared electrocatalysts of pure and Sm doped  $\text{WO}_3$  for 10,000 s recorded for (a) HER and (b) OER.

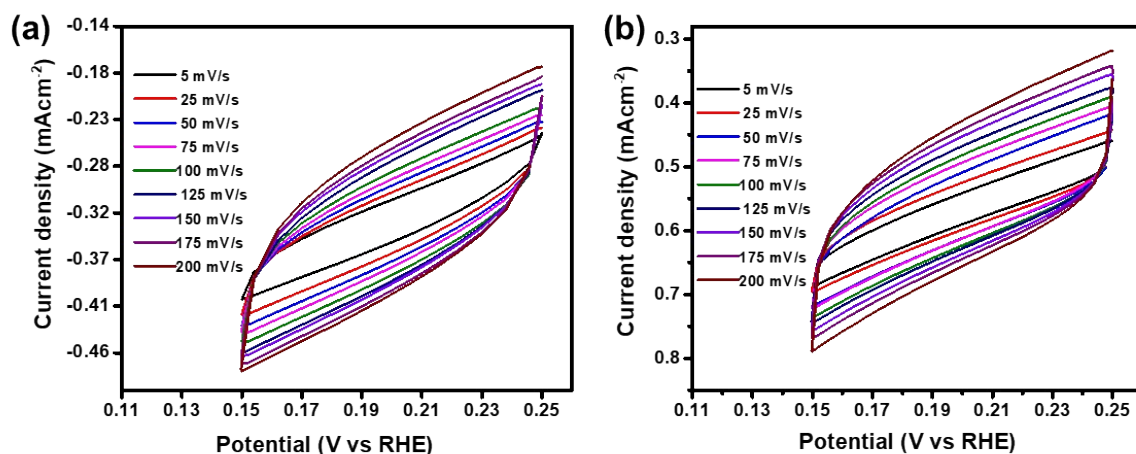

Figure S4. Cyclic voltammograms recorded in the non-Ohmic region of (a)  $\text{WO}_3$  – Sm 4% and (b)  $\text{WO}_3$  – Sm 5% electrocatalysts.

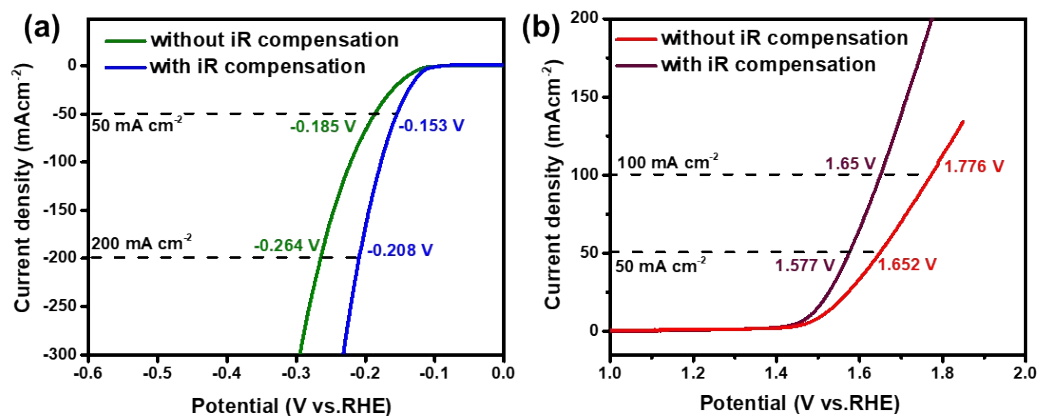

Figure S5. The LSV polarization curves of (a) Sm 4% doped  $\text{WO}_3$  electrocatalyst with and without iR compensation for HER and (b) Sm 5% doped  $\text{WO}_3$  electrocatalyst with and without iR compensation for OER.

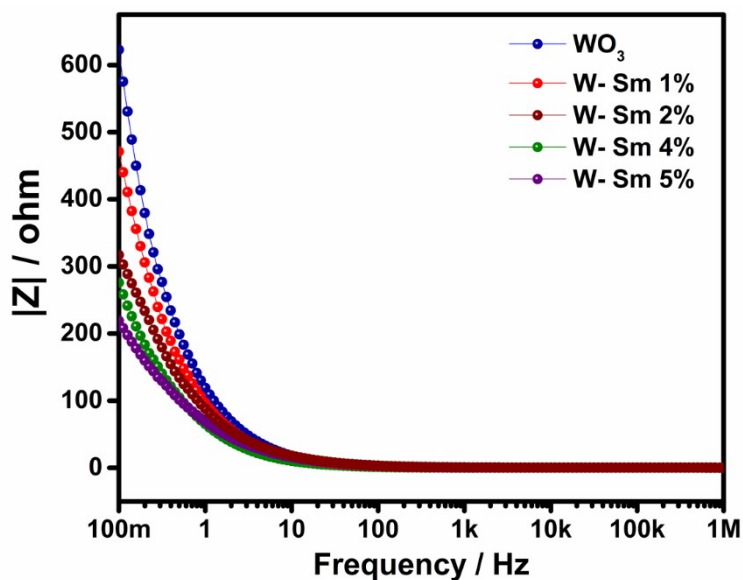

Figure S6. The Bode impedance plot obtained from the electrochemical impedance spectroscopy for all the electrocatalyst of  $\text{WO}_3$  and its Sm doped constituent.

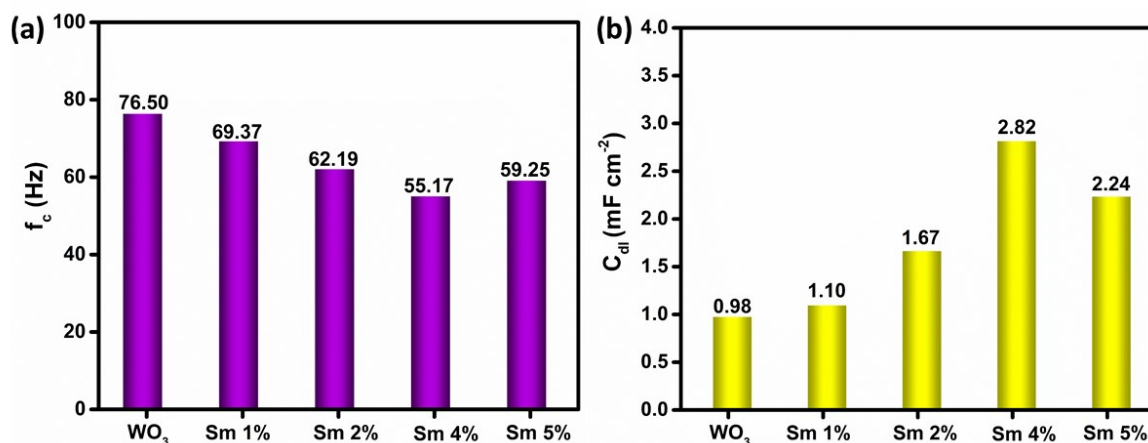

Figure S7. Comparison of (a) cut-off frequency ( $f_c$ ) in Hz with the (b) electrochemical active surface area ( $C_{dl}$ ) in  $\text{mF cm}^{-2}$  of all the synthesized electrocatalysts.

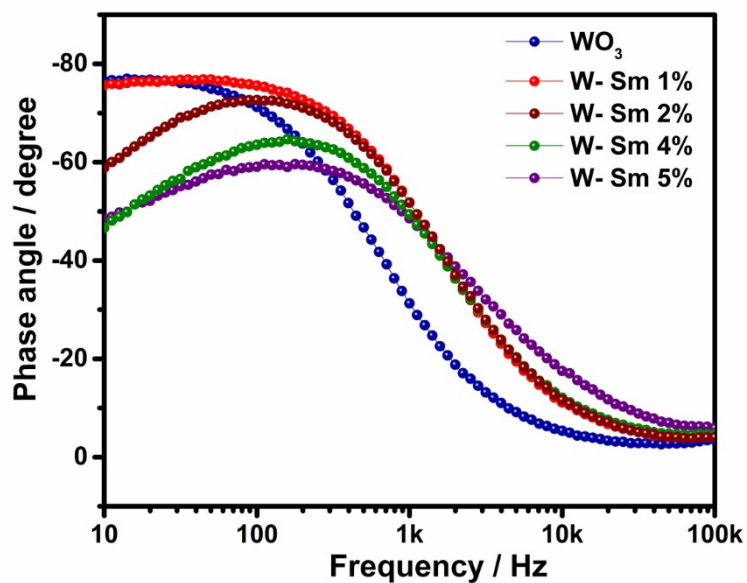

Figure S8. (a) Bode phase angle plot of all the synthesized  $\text{WO}_3$  electrocatalysts obtained from the electrochemical impedance spectroscopy.

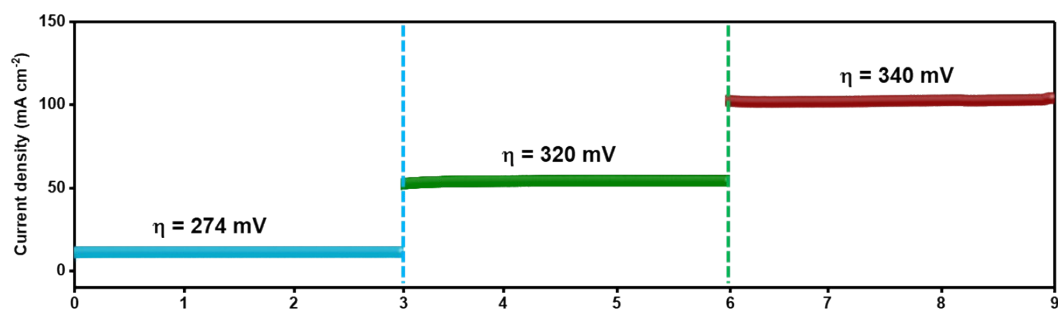

Figure S9. Prolonged potentiostatic electrolysis with Sm 5% doped  $\text{WO}_3$  electrocatalyst for OER varying the onset potential in different intervals of time.

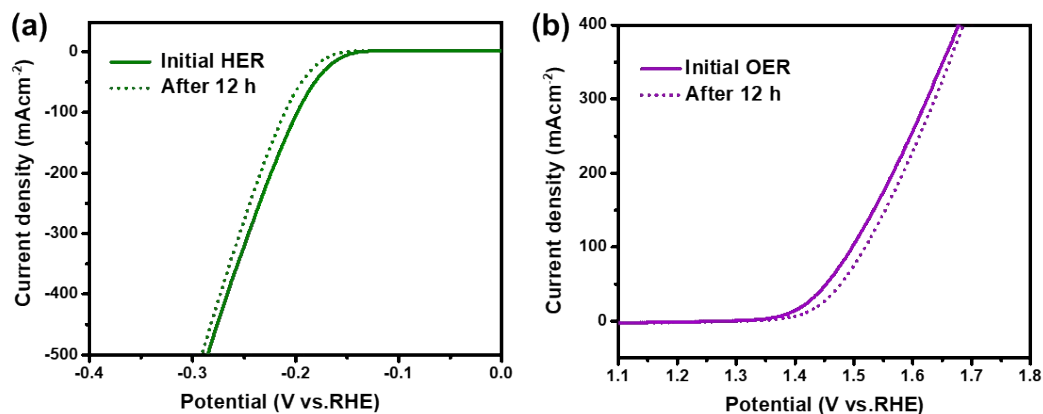

Figure S10. a) LSV measurements of HER screened at  $5 \text{ mV s}^{-1}$  on  $\text{WO}_3 - \text{Sm } 4\%$  before and after potentiostatic electrolysis, (b) LSV measurements of OER screened at  $5 \text{ mV s}^{-1}$  on  $\text{WO}_3 - \text{Sm } 5\%$  electrocatalyst before and after the prolonged potentiostatic electrolysis.

Table S1. The calculated mass loading of electrochemical activated  $\text{WO}_3 - \text{Sm } 4\%$  for HER and  $\text{WO}_3 - \text{Sm } 5\%$  for OER on carbon cloth fibre (CC) substrate.

| Sample code                        | Mass loading<br>( $\text{mg}/\text{cm}^2$ ) |
|------------------------------------|---------------------------------------------|
|                                    | 0.5M $\text{H}_2\text{SO}_4$                |
| CC@ $\text{WO}_3 - \text{Sm } 4\%$ | $3.67 \pm 0.27$                             |
| CC@ $\text{WO}_3 - \text{Sm } 5\%$ | $3.34 \pm 0.26$                             |

Table S2. The comparison of HER activity between the Sm 4% doped  $\text{WO}_3$  catalyst and other reported electrocatalysts of  $\text{WO}_3$  derived from Fig 13c.

| S. No | Electrocatalyst        | Overpotential ( $\eta$ )<br>@ $10 \text{ mA cm}^{-2}$<br>(mV) | Tafel slope<br>( $\text{mV dec}^{-1}$ ) | Reference |
|-------|------------------------|---------------------------------------------------------------|-----------------------------------------|-----------|
| 1.    | Zeolite/ $\text{WO}_3$ | 138                                                           | 500                                     | [1]       |
| 2.    | Mn- $\text{WO}_3$      | 63                                                            | 61                                      | [2]       |

|     |                                                          |      |      |           |
|-----|----------------------------------------------------------|------|------|-----------|
| 3.  | WO <sub>3-x</sub> @NC                                    | 37   | 96   | [3]       |
| 4.  | G/WS <sub>2</sub> /WO <sub>3</sub>                       | 90   | 100  | [4]       |
| 5.  | WSe <sub>2</sub> /WO <sub>3-y</sub>                      | 58.2 | 185  | [5]       |
| 6.  | Pd@WO <sub>3</sub>                                       | 95   | 287  | [6]       |
| 7.  | Meso-WO <sub>2.83</sub>                                  | 87   | 225  | [7]       |
| 8.  | WO <sub>3</sub> /NPRGO                                   | 115  | 40   | [8]       |
| 9.  | WO <sub>3</sub> /C@CoO                                   | 61   | 42   | [9]       |
| 10. | Pt/WO <sub>3</sub>                                       | 121  | 150  | [10]      |
| 11. | CoSe <sub>2</sub> /WSe <sub>2</sub> /WO <sub>3</sub> @CC | 68   | 97   | [11]      |
| 12. | WS <sub>2</sub> /WO <sub>3</sub>                         | 50   | 395  | [12]      |
| 13. | WO <sub>x</sub> Nws/N-rGO                                | 38.2 | 40   | [13]      |
| 14. | Ta-WO <sub>3</sub>                                       | 65   | 470  | [14]      |
| 15. | Fe-WO <sub>x</sub> P/rGO                                 | 42   | 54.6 | [15]      |
| 16. | WO <sub>3</sub> – Sm 4%                                  | 67   | 135  | This work |
| 17. | CC@WO <sub>3</sub> – Sm 4%                               | 54   | 157  | This work |

Table S3. The comparison of OER activity between the Sm 5% doped WO<sub>3</sub> catalyst and other reported electrocatalysts of WO<sub>3</sub> obtained from Fig 13d.

| S. No | Electrocatalyst                                                                           | Overpotential ( $\eta$ ) @<br>10 mA cm <sup>-2</sup><br>(mV) | Tafel slope<br>(mV dec <sup>-1</sup> ) | Reference |
|-------|-------------------------------------------------------------------------------------------|--------------------------------------------------------------|----------------------------------------|-----------|
| 1.    | WO <sub>3</sub> -Vo (oxygen vacancies)                                                    | 183.3                                                        | 590                                    | [16]      |
| 2.    | IrO <sub>2</sub> /WO <sub>3</sub>                                                         | 65                                                           | 420                                    | [17]      |
| 3.    | H <sub>x</sub> -WO <sub>3</sub>                                                           | 134                                                          | 110                                    | [18]      |
| 4.    | SrCo <sub>0.4</sub> Fe <sub>0.2</sub> W <sub>0.4</sub> O <sub>3-<math>\delta</math></sub> | 104                                                          | 296                                    | [19]      |
| 5.    | WO <sub>3-x</sub> @NC                                                                     | 86                                                           | 306                                    | [3]       |
| 6.    | Pd@WO <sub>3</sub>                                                                        | 62.8                                                         | 113                                    | [6]       |
| 7.    | WO <sub>3</sub> – Sm 5%                                                                   | 102                                                          | 146                                    | This work |
| 8.    | CC@WO <sub>3</sub> – Sm 5%                                                                | 90                                                           | 138                                    | This work |

Table S4: Comparison of water-splitting performances for CC@WO<sub>3</sub>-Sm 4% and CC@WO<sub>3</sub>-Sm 5% with reported bifunctional electrocatalysts in the acidic media.

| S.No | Electrocatalyst                                           | Substrate    | Potential                             | Refs.                                 |
|------|-----------------------------------------------------------|--------------|---------------------------------------|---------------------------------------|
| 1.   | CoS <sub>2</sub> nanotube                                 | Carbon cloth | 1.67 at 10 mA cm <sup>-2</sup>        | Nanoscale Horiz. 2017, 2, 342.        |
| 2.   | Ni/Mo <sub>2</sub> C                                      | Carbon cloth | 1.66 at 10 mA cm <sup>-2</sup>        | Chem. Sci. 2018, 8, 968.              |
| 3.   | P-Co <sub>3</sub> O <sub>4</sub>                          | Ni foam      | 1.63 at 10 mA cm <sup>-2</sup>        | ACS Catal. 2018, 8, 2236.             |
| 4.   | E-Mo-NiCoP  <br>MoNiCoP                                   | Carbon cloth | 1.61 at 10 mA cm <sup>-2</sup>        | Nano-Micro Letters, 2019,11, 55       |
| 5.   | NiMoP <sub>2</sub> nanowires                              | Carbon cloth | 1.67 at 10 mA cm <sup>-2</sup>        | J. Mater. Chem. A 2020, 5, 7191.      |
| 6.   | NiCo <sub>2</sub> P <sub>2</sub> /graphene quantum dot    | Ti mesh      | 1.61 at 10 mA cm <sup>-2</sup>        | Nano Energy 2020, 48, 284.            |
| 7.   | FeCoP ultrathin arrays                                    | Ni foam      | 1.60 at 10 mA cm <sup>-2</sup>        | Nano Energy 2021, 41, 583.            |
| 8.   | N-NiMoO <sub>4</sub> /NiS <sub>2</sub>                    | Carbon cloth | 1.60 at 10 mA cm <sup>-2</sup>        | Adv. Funct. Mater. 2021, 29, 1805298. |
| 9.   | CC@WO <sub>3</sub> -Sm 4%   <br>CC@WO <sub>3</sub> -Sm 5% | Carbon cloth | 1.60 V at 10 mA cm <sup>-2</sup><br>2 | This work                             |

#### Reference

- [1] S.F. Anis, R. Hashaikeh, Electrochemical water splitting using nano-zeolite Y supported tungsten oxide electrocatalysts, J. Nanoparticle Res. 20 (2018). doi:10.1007/s11051-018-4153-2.
- [2] S. Chandrasekaran, P. Zhang, F. Peng, C. Bowen, J. Huo, L. Deng, Tailoring the geometric and electronic structure of tungsten oxide with manganese or vanadium doping toward highly efficient electrochemical and photoelectrochemical water splitting, J. Mater. Chem. A. 7 (2019) 6161–6172. doi:10.1039/c8ta12238e.

- [3] J. Chen, H. Yang, X. Sang, Z. Su, D. Li, Q. Wang, Oxygen vacancy rich tungsten oxide with nitrogen doped mesoporous carbon as matrix for overall water splitting and 4-nitrophenol reductive removal, *Solid State Sci.* 83 (2018) 23–30. doi:10.1016/j.solidstatesciences.2018.06.010.
- [4] Y. Chen, R. Ren, Z. Wen, S. Ci, J. Chang, S. Mao, J. Chen, Superior electrocatalysis for hydrogen evolution with crumpled graphene/tungsten disulfide/tungsten trioxide ternary nanohybrids, *Nano Energy.* 47 (2018) 66–73. doi:10.1016/j.nanoen.2018.02.023.
- [5] V.Y. Fominski, S.N. Grigoriev, R.I. Romanov, M.A. Volosova, A.I. Grunin, G.D. Teterina, The formation of a hybrid structure from tungsten selenide and oxide plates for a hydrogen-evolution electrocatalyst, *Tech. Phys. Lett.* 42 (2016) 555–558. doi:10.1134/S1063785016060055.
- [6] R. Choudhary, S. Patra, R. Madhuri, P.K. Sharma, Cow Dung Derived PdNPs@WO<sub>3</sub> Porous Carbon Nanodiscs as Trifunctional Catalysts for Design of Zinc-Air Batteries and Overall Water Splitting, *ACS Sustain. Chem. Eng.* 5 (2017) 9735–9748. doi:10.1021/acssuschemeng.7b01541.
- [7] H. Cheng, M. Klapproth, A. Sagaltchik, S. Li, A. Thomas, Ordered mesoporous WO<sub>2.83</sub>: Selective reduction synthesis, exceptional localized surface plasmon resonance and enhanced hydrogen evolution reaction activity, *J. Mater. Chem. A.* 6 (2018) 2249–2256. doi:10.1039/c7ta09579a.
- [8] G. Hu, J. Li, P. Liu, X. Zhu, X. Li, R.N. Ali, B. Xiang, Enhanced electrocatalytic activity of WO<sub>3</sub>@NPRGO composite in a hydrogen evolution reaction, *Appl. Surf. Sci.* 463 (2019) 275–282. doi:10.1016/j.apsusc.2018.08.227.
- [9] Y. Lv, Y. Liu, C. Chen, T. Wang, M. Zhang, Octopus tentacles-like WO<sub>3</sub>/C@CoO as high property and long life-time electrocatalyst for hydrogen evolution reaction, *Electrochim. Acta.* 281 (2018) 1–8. doi:10.1016/j.electacta.2018.05.145.
- [10] H. Tian, X. Cui, L. Zeng, L. Su, Y. Song, J. Shi, Oxygen vacancy-assisted hydrogen evolution reaction of the Pt/WO<sub>3</sub> electrocatalyst, *J. Mater. Chem. A.* 7 (2019) 6285–6293. doi:10.1039/c8ta12219a.
- [11] Y. Lv, Y. Liu, Y. Liu, Z. Chen, M. Zhang, CoSe<sub>2</sub>/WSe<sub>2</sub>/WO<sub>3</sub> hybrid nanowires on



- carbon cloth for efficient hydrogen evolution reaction, *J. Alloys Compd.* 768 (2018) 889–895. doi:10.1016/j.jallcom.2018.07.285.
- [12] X. Shang, Y. Rao, S.S. Lu, B. Dong, L.M. Zhang, X.H. Liu, X. Li, Y.R. Liu, Y.M. Chai, C.G. Liu, Novel WS<sub>2</sub>/WO<sub>3</sub> heterostructured nanosheets as efficient electrocatalyst for hydrogen evolution reaction, *Mater. Chem. Phys.* 197 (2017) 123–128. doi:10.1016/j.matchemphys.2017.05.027.
- [13] T.H. Wondimu, G.C. Chen, H.Y. Chen, D.M. Kabtamu, A.W. Bayeh, K.C. Wang, H.C. Huang, C.H. Wang, High catalytic activity of oxygen-vacancy-rich tungsten oxide nanowires supported by nitrogen-doped reduced graphene oxide for the hydrogen evolution reaction, *J. Mater. Chem. A.* 6 (2018) 19767–19774. doi:10.1039/c8ta07000h.
- [14] X. Xie, W. Mu, X. Li, H. Wei, Y. Jian, Q. Yu, R. Zhang, K. Lv, H. Tang, S. Luo, Incorporation of tantalum ions enhances the electrocatalytic activity of hexagonal WO<sub>3</sub> nanowires for hydrogen evolution reaction, *Electrochim. Acta.* 134 (2014) 201–208. doi:10.1016/j.electacta.2014.04.122.
- [15] T.H. Wondimu, G.C. Chen, D.M. Kabtamu, H.Y. Chen, A.W. Bayeh, H.C. Huang, C.H. Wang, Highly efficient and durable phosphine reduced iron-doped tungsten oxide/reduced graphene oxide nanocomposites for the hydrogen evolution reaction, *Int. J. Hydrogen Energy.* 43 (2018) 6481–6490. doi:10.1016/j.ijhydene.2018.02.080.
- [16] H. Liang, Z. Cao, C. Xia, F. Ming, W. Zhang, A.-H. Emwas, L. Cavallo, H.N. Alshareef, Tungsten Blue Oxide as a Reusable Electrocatalyst for Acidic Water Oxidation by Plasma-Induced Vacancy Engineering, (n.d.). doi:10.31635/ccschem.020.202000325.
- [17] M. Tariq, W.Q. Zaman, Y. Wu, A. Nabi, Z. Abbas, W. Iqbal, W. Sun, Z. Hao, Z.H. Zhou, L. Cao, J. Yang, Facile synthesis of IrO<sub>2</sub> nanoparticles decorated @ WO<sub>3</sub> as mixed oxide composite for outperformed oxygen evolution reaction, *Int. J. Hydrogen Energy.* 44 (2019) 31082–31093. doi:10.1016/j.ijhydene.2019.10.013.
- [18] A.G. Breuhaus-Alvarez, J.L. Dimeglio, J.J. Cooper, C.R. Lhermitte, B.M. Bartlett, Kinetics and Faradaic Efficiency of Oxygen Evolution on Reduced H<sub>x</sub> WO<sub>3</sub> Photoelectrodes, *J. Phys. Chem. C.* 123 (2019) 1142–1150. doi:10.1021/acs.jpcc.8b11777.

- [19] G. Chen, Z. Hu, Y. Zhu, Z.G. Chen, Y. Zhong, H.J. Lin, C. Te Chen, L.H. Tjeng, W. Zhou, Z. Shao, Ultrahigh-performance tungsten-doped perovskites for the oxygen evolution reaction, *J. Mater. Chem. A*. 6 (2018) 9854–9859. doi:10.1039/c8ta02864h.
